# Supplementary material
Source: Springer Nature journal article supplement (https://www.springermedizin.de/resource/supplementary/12889_2011_4545_MOESM1_ESM.pdf/9491416)

As part of normal occupational healthcare

Randomized controlled trial

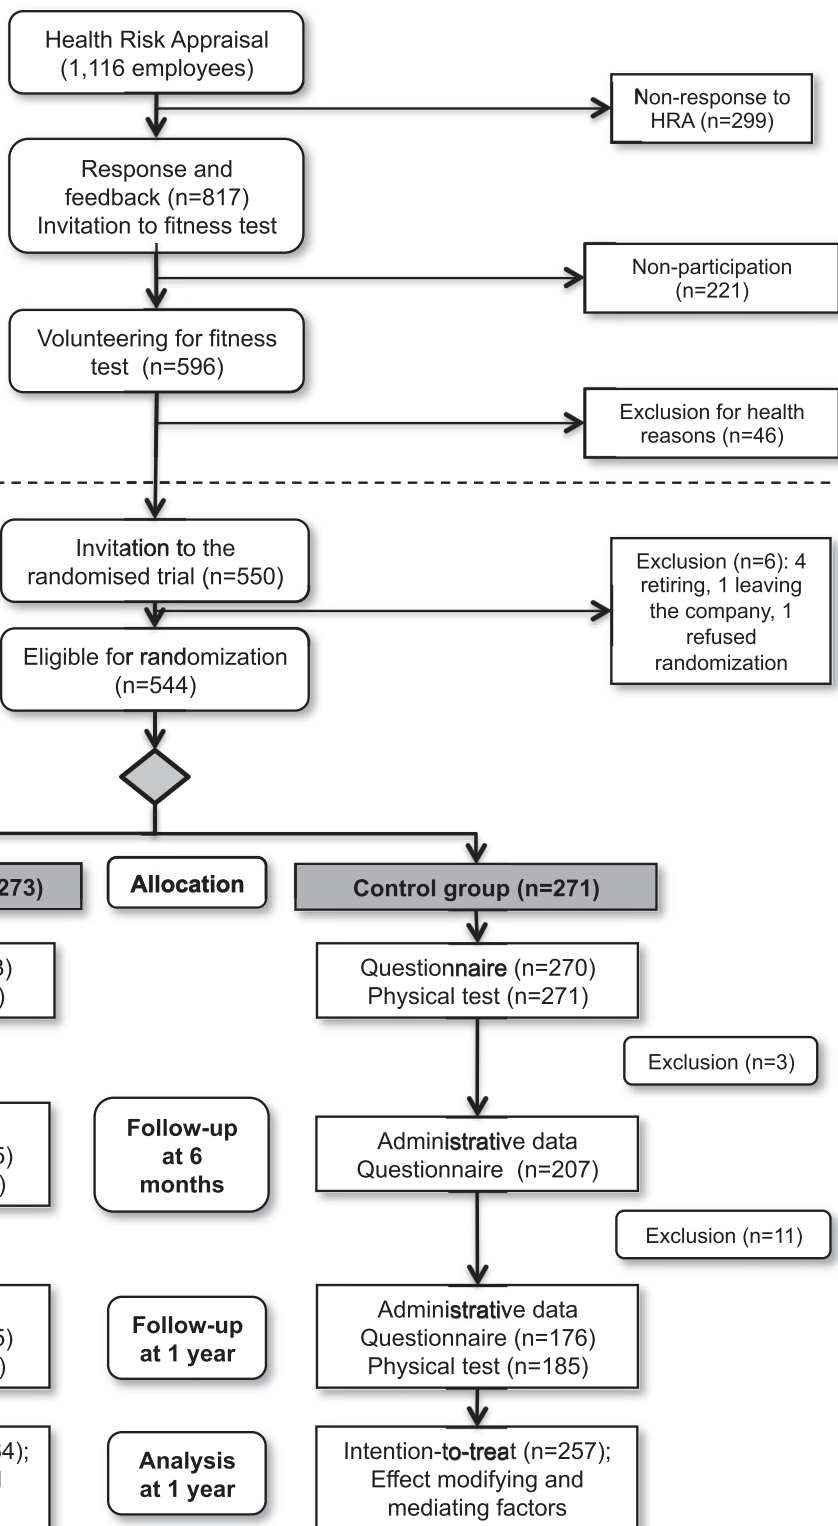

Supplement: MOESM1 [file 9491416]
